1 **Identifying chemogenetic interactions from CRISPR knockout screens with**  
2 **drugZ**

3

4

5 Medina Colic[1,2], Gang Wang[1], Michal Zimmermann[3], Keith Mascall[4], Megan  
6 McLaughlin [1], Lori Bertolet [1], W. Frank Lenoir[1,2], Jason Moffat[5,6], Stephane  
7 Angers[4,7], Daniel Durocher[3,6], Traver Hart[1]\*

8

9

10 1 - Department of Bioinformatics and Computational Biology, The University of  
11 Texas MD Anderson Cancer Center, Houston, TX, USA

12

13 2-UTHealth Graduate School of Biomedical Sciences, The University of Texas MD  
14 Anderson Cancer Center, Houston, TX, USA

15

16 3-Lunenfeld-Tanenbaum Research Institute, Mount Sinai Hospital, 600 University  
17 Avenue, Toronto, ON, M5G 1X5, Canada

18

19 4-Department of Pharmaceutical Sciences, Leslie Dan Faculty of Pharmacy,  
20 University of Toronto, Toronto, ON, Canada

21

22 5-Donnelly Centre, University of Toronto, Toronto, ON, Canada

23

24 6-Department of Molecular Genetics, University of Toronto, Toronto, ON, M5S 3E1,  
25 Canada

26

27 7- Department of Biochemistry, University of Toronto, ON, Canada

28

29

30

31 \*To whom correspondence should be addressed: [traver@hart-lab.org](mailto:traver@hart-lab.org)

32

33

34

35

36

37

## 38 **Abstract**

39

40 Chemogenetic profiling enables the identification of gene mutations that enhance or  
41 suppress the activity of chemical compounds. This knowledge provides insights into  
42 drug mechanism-of-action, genetic vulnerabilities, and resistance mechanisms, all of  
43 which may help stratify patient populations and improve drug efficacy. CRISPR-  
44 based screening enables sensitive detection of drug-gene interactions directly in  
45 human cells, but until recently has largely been used to screen only for resistance  
46 mechanisms. We present drugZ, an algorithm for identifying both synergistic and  
47 suppressor chemogenetic interactions from CRISPR screens. DrugZ identifies  
48 synthetic lethal interactions between PARP inhibitors and both known and novel  
49 members of the DNA damage repair pathway. Additionally, drugZ confirms KEAP1  
50 loss as a resistance factor for ERK inhibitors in oncogenic KRAS backgrounds and  
51 identifies additional cell-specific mechanisms of drug resistance. The software is  
52 available at [github.com/hart-lab/drugz](https://github.com/hart-lab/drugz).

53

54

55

## 56 **Introduction**

57

58 The ability to systematically interrogate multiple genetic backgrounds with  
59 chemical perturbagens is known as chemogenetic profiling. While this approach has  
60 many applications in chemical biology, it is particularly relevant to cancer therapy,  
61 where clinical compounds or chemical probes are profiled to identify mutations that  
62 inform on genetic vulnerabilities, resistance mechanisms, or targets [1]. Systematic  
63 surveys of the fitness effects of environmental perturbagens across the yeast  
64 deletion collection [2] offered insight into gene function at a large scale, while  
65 profiling of drug sensitivity in heterozygous deletion strains identified genetic  
66 backgrounds that give rise to increased drug sensitivity [3]. Now, with the advent of  
67 CRISPR technology and its adaptation to pooled library screens in mammalian cells,  
68 high-resolution chemogenetic screens can be carried out directly in human cells [4-  
69 6]. Major advantages to this approach include the ability to probe all human genes,

70 not just orthologs of model organisms; the analysis of how drug-gene interactions  
71 vary across different tissue types, genetic backgrounds, and epigenetic states; and  
72 the identification of suppressor as well as synergistic interactions, that may  
73 preemptively indicate mechanisms of acquired resistance or pre-existing sources of  
74 resistant cells in heterogeneous tumor populations.

75

76 Design and analysis of CRISPR-mediated chemogenetic interaction screens in  
77 human cells can be problematic. Positive selection screens identifying genes  
78 conferring resistance to cellular perturbations typically have a high signal-to-noise  
79 ratio, as only mutants in resistance genes survive. This approach has been used to  
80 identify genes conferring resistance to targeted therapeutics, including BRAF and  
81 MEK inhibitors, as well as other drugs [5, 7-14]. Conversely, negative selection  
82 CRISPR screens require growing perturbed cells over 10 or more doublings to allow  
83 sensitive detection of genes whose knockout leads to moderate fitness defects.  
84 Adding a drug interaction necessitates dosing at sub-lethal levels to balance  
85 between maintaining cell viability over a long timecourse and inducing drug-gene  
86 interactions beyond native drug effects. To our knowledge, a study by Zimmerman  
87 *et al.* [15] and Wang *et al.* [16] last year, which each used an early version of the  
88 software described here, represents the first such efforts in cancer cells.

89

90 Several algorithms currently exist for the analysis of drug-gene interaction  
91 experiments [17, 18]. Most rely on adapting methods originally developed for the  
92 analysis of RNAseq differential expression data, which is typically characterized by  
93 relatively high read counts across genes. High read counts enable the statistically  
94 robust detection and ranking of differential expression of genes (in RNA-seq) or  
95 abundance of guide RNA (gRNA, in CRISPR screens) using approaches such as the  
96 negative binomial P-value model, a trend explored thoroughly in [18]. However, low  
97 read counts per gRNA are common in CRISPR data, and are a fundamental feature of  
98 genes with fitness defects, leading to a severe loss of sensitivity when applied to  
99 CRISPR screens for synthetic chemogenetic interactions.

100

101 In this study, we describe drugZ, an algorithm for the analysis of CRISPR-mediated  
102 chemogenetic interaction screens. We apply the algorithm to identify genes that  
103 drive normal cellular resistance to the PARP inhibitor olaparib in three cell lines. We  
104 demonstrate the greatly enhanced sensitivity of drugZ over contemporary  
105 algorithms by showing how it identifies more hits with higher enrichment for the  
106 expected DNA damage response pathway, and further how it identifies both  
107 synergistic and suppressor interactions. We further demonstrate the discovery of  
108 both synergistic and suppressor interactions in a single experiment with KRAS-  
109 mutant pancreatic cancer cell lines treated with an ERK inhibitor, and with several  
110 first-line therapeutic compounds screened in RPE1 hTERT-immortalized epithelial  
111 cells. We provide all software and data necessary to replicate the analyses presented  
112 here in our repository at [github.com/hart-lab/drugz](https://github.com/hart-lab/drugz).

113

## 114 **Results and Discussion**

115

116 We created the drugZ algorithm to fill a need for a method to identify chemogenetic  
117 interactions in CRISPR knockout screens. In a pooled library CRISPR screen, the  
118 relative starting abundance of each gRNA in the pool is usually sampled immediately  
119 after infection and selection. To identify genes whose knockout results in a fitness  
120 defect (“essential genes”), the cells are grown for several doublings and the relative  
121 abundance of gRNA is again sampled by deep sequencing of a PCR product amplified  
122 from genomic DNA template. The relative frequency of each gRNA is compared to  
123 starting gRNA abundance and genes whose targeting gRNA show consistent dropout  
124 are considered essential genes.

125

126 In a chemogenetic interaction screen, the readout is different: the relative  
127 abundance of gRNA in a treated population is compared to the relative abundance of  
128 an untreated population at a matched timepoint (Figure 1A). In this context, an  
129 experimental design with paired samples should be particularly powerful, as it  
130 removes a major source of variability across replicates.

131

132 To benchmark the method, we evaluated screens to identify modifiers of the

133 response to the

PARP inhibitor

olaparib in three cell

lines, RPE1-hTERT,

HeLa, and

SUM149PT [15]. The

screens were

performed using the

TKOv1 library of

90k gRNA targeting

17,000 genes [19].

After infection and

selection, each cell

line was split into 3

replicates, passaged

at least once, and

each replicate was

further split into

control and

olaparib-treated

populations,

providing a paired-

sample

experimental design

(Figure 1A).

The drugZ algorithm

calculates a fold

161 change for each gRNA in an experimental condition relative to an untreated control.

162 A Z-score for each fold change is calculated using an empirical Bayes estimate of the

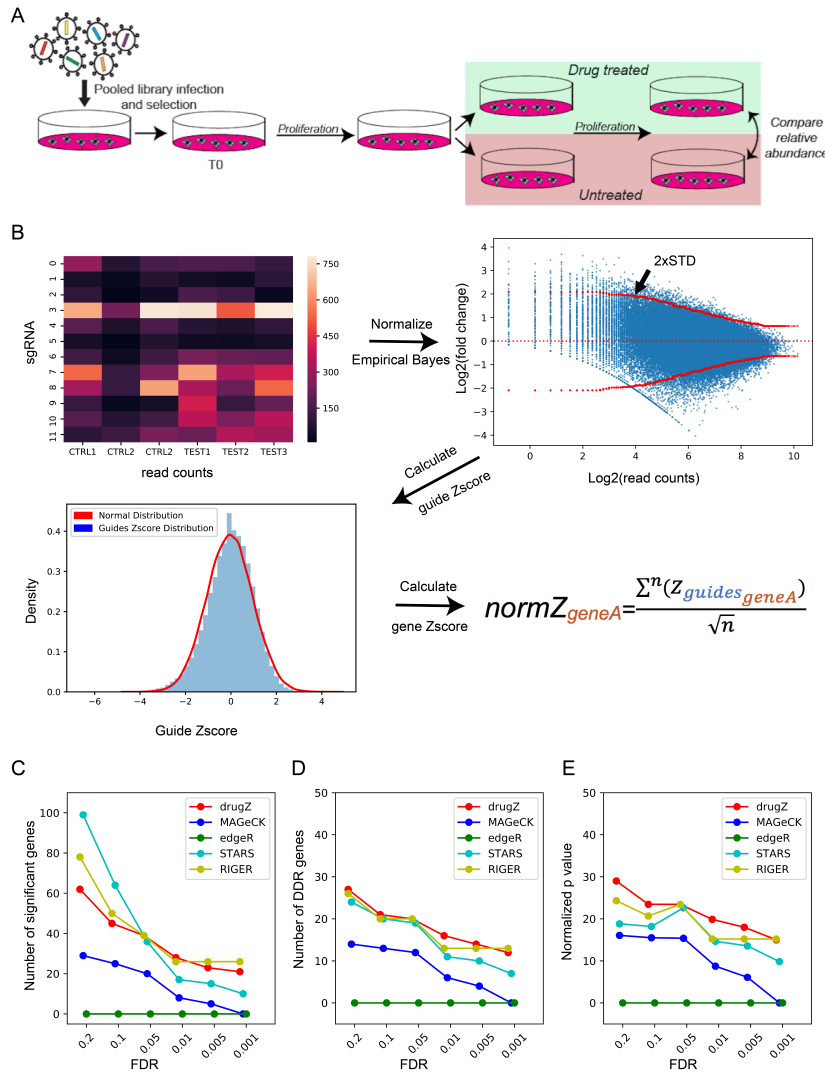

Figure 1. **Workflow.** (A) Experimental design. In a drug-gene interaction screen, cells are transduced with a pooled CRISPR library. Cells are split into drug treated and untreated control samples, grown for several doublings, genomic DNA is collected, and the relative abundance of CRISPR gRNA sequences in the treated and control population is compared. (B) DrugZ processing steps include normalizing read counts, calculating fold change, estimating the standard deviation for each fold change, Z-score transformation, and combining guide scores into a gene score. (C-E) Comparing existing methods vs. drugZ for SUM149PT olaparib screen. DrugZ hits show strongest enrichments for DDR genes across a range of FDR thresholds. (C) number of raw hits. (D) number of annotated DNA Damage Response (DDR) genes in hits. (E)  $-\log$  P-values for DDR gene enrichment by hypergeometric test.

135

The drugZ algorithm

---

calculates a fold

163 standard deviation, by “borrowing” information from gRNA observed at a similar  
164 frequency (read count) in the control cells. Guide-level gene scores are combined  
165 into a normalized gene-level Z-scores called normZ, from which P-values are  
166 estimated from a normal distribution (Figure 1b). We used drugZ to calculate  
167 normZ scores, P-values, and false discovery rates in SUM149PT breast cancer cells,  
168 which carry BRCA1 and TP53 mutations. We also analyzed the same data with four  
169 contemporary methods, STARS [7], MAGeCK [18], edgeR [20], and RIGER [21]. We  
170 noted that drugZ produced a moderate number of overall hits, relative to other  
171 methods, as FDR thresholds were relaxed (Figure 1c). We evaluated the quality of  
172 the hits by measuring their functional coherence. The PARP inhibitor olaparib was  
173 developed specifically to exploit the observed synthetic lethal relationship between  
174 PARP1 and the BRCA1/BRCA2 genes [22, 23]. Subsequent studies have shown it to  
175 be effective against a general deficiency in homologous recombination repair,  
176 known as HRD [24]. We therefore calculated the enrichment of each hit set for genes  
177 in the DNA damage response (DDR) pathway as annotated in the Reactome database  
178 [25] and found that drugZ hits show strong enrichment for DDR genes across a  
179 range of FDR thresholds (Figure 1d,e), while the other methods show consistently  
180 lower enrichment. We observed similar trends in an olaparib screen in HeLa cells  
181 (Supplementary Figure 1A) but less overall effect in RPE1 wildtype epithelial cells  
182 (Supplementary Figure 1B). The combination of larger sets of hits and greater  
183 enrichment for expected results indicates that drugZ accurately and sensitively  
184 identifies chemogenetic interactions.

185

186 The drugZ algorithm can also be used to identify suppressor interactions; that is,  
187 genes whose perturbation reduces drug efficacy. While *BRCA1* mutation is synthetic  
188 lethal with *PARP1*, subsequent mutation of *TP53BP1* is associated with acquired  
189 resistance to the PARP inhibitor [26]. Drug-gene interactions resulting in positive Z-  
190 scores reflect such suppressor interactions. Indeed, *TP53BP1* is the 8<sup>th</sup>-ranked  
191 suppressor interaction in *BRCA1*-deficient SUM149PT cells, with a normZ score of  
192 3.05. Similarly, newly described resistance gene *C20orf196*, now called *SHLD1* [27-  
193 30], is the top ranked suppressor.

194

195 *Robustness to Parameter Choice and Experimental Design.* To evaluate the robustness  
196 of the drugZ approach, we conducted sensitivity analysis using data from the  
197 SUM149PT olaparib screen. The algorithm relies on two major tunable parameters,  
198 window size for empirical Bayes variance estimation and a monotone filter for the  
199 variance estimator (to ensure non-decreasing variance as read count decreases).  
200 The window size represents the number of neighboring gRNA, ranked by read  
201 count, to use to evaluate gRNA fold change variance. To evaluate the effect of  
202 varying window size, we ran the drugZ pipeline with window sizes in five increment  
203 from 100 to 1,000; neither number of hits, number of DDR-annotated hits, nor  
204 enrichment p-value were affected by changing window size (Supplementary Figure  
205 2a). We performed a similar analysis with and without enforcing the monotone filter  
206 and discovered marginally improved performance in the SUM149PT olaparib screen  
207 without enforcing monotonicity (Supplementary Figure 2b), but no such effect in  
208 Hela (T15) olaparib screen (Supplementary Figure 2c). We therefore left the filter in  
209 place.

210

211 We also tested the drugZ pipeline against a more statistically thorough, but  
212 computationally demanding, approach. After using the same empirical Bayes  
213 approach to calculate a Z-score for each guide, we applied Gibbs sampling to  
214 estimate the posterior distribution of fold changes for each gene. This method,  
215 which we termed drugGS, yielded results that are virtually identical to drugZ  
216 ( $\rho=0.99$ ; Supplementary Figure 3B) at  $\sim 50x$  the computational cost  
217 (Supplementary Figure 3C). DrugGS is also available on github at  
218 <https://github.com/hart-lab/druggs>.

219

220 *Experimental design considerations.* Highly effective CRISPR knockout screens are  
221 done with a variety of experimental designs, with varying numbers of replicates,  
222 degree of library coverage, determination of endpoint, and whether intermediate  
223 timepoints are included [5-7, 19, 31-37]. The olaparib drug-gene interaction screens  
224 described here were performed in triplicate in 15cm plates and passaged every

225 three days, with drug added at day 6 and samples collected for sequencing at each  
 226 passage starting at day 12. Using the optimized drugZ pipeline, we evaluated each  
 227 timepoint in the SUM149PT screens. The screen's ability to resolve specific DNA  
 228 damage response genes increased steadily from day 12 to day 18 (Figure 2a-c),  
 229 highlighting the importance of low-dose drug treatment (e.g. LD20). The extended  
 230 timeframe for the experiment allows greater resolution of negative selection hits as  
 231 they disappear from the population over several doublings.

232

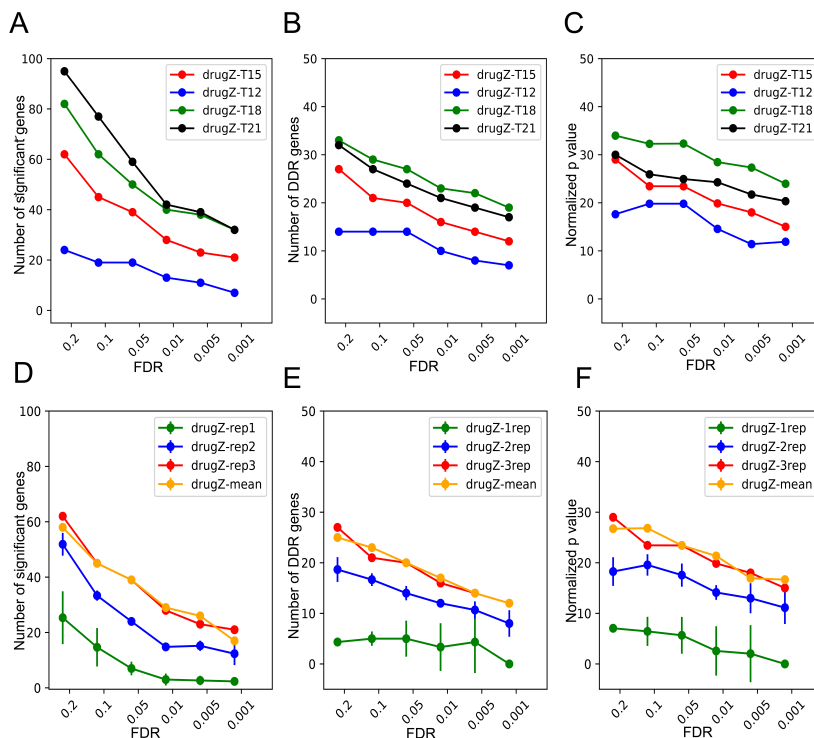

**Figure 2. Experimental design effects.** (A-C) DrugZ performance across different time points for SUM149PT olaparib screen. (A) number of raw hits. (B) number of annotated DNA Damage Response (DDR) genes in hits. (C)  $-\log$  P-values for DDR gene enrichment. (D-F) DrugZ performance based on varying number of replicates. (D) number of raw hits. (E) number of annotated DNA Damage Response (DDR) genes in hits. (F)  $-\log$  P-values for DDR gene enrichment. Rep1,2,3: all combinations of one, two, or three replicates, +/- s.d. Mean: comparing mean of drug-treated samples to the mean of control samples (unpaired approach).

251 however, the paired-sample approach does not appear to offer significant benefits  
 252 over an unpaired approach: when calculating fold change as the log ratio of the  
 253 means of three experimental and three control samples, the results are nearly  
 254 identical to analysis of three paired samples (Figure 2d-f). Indeed, treating samples

Nevertheless, the screens are still quite noisy, necessitating several replicates for accurate assessment of drug-gene interactions. Paired-sample analysis of three replicates in the olaparib screen

clearly outperforms one- or two-replicate designs (Figure 2d-f). Surprisingly,



255 as paired or unpaired produced highly correlated results ( $\rho \geq 0.96$ ) in all three  
 256 olaparib screens (Supplementary Figure 4a-d).

257

258 *A general-use algorithm*  
 259 *for drug-gene interactions.*

260 To ensure that the drugZ  
 261 algorithm is not  
 262 overspecialized for the  
 263 strong chemogenetic  
 264 profile of PARP inhibitors,  
 265 we applied it to a separate  
 266 set of drug interaction

267 screens in pancreatic  
 268 cancer cell lines using the  
 269 ERK1/2 inhibitor  
 270 SCH772984. Oncogenic  
 271 mutations in *KRAS* drive  
 272 constitutive signaling in  
 273 the MAP kinase pathway  
 274 and are associated with  
 275 proliferation and survival  
 276 signals. Consistent with  
 277 current models of *RAS*  
 278 pathway activation,  
 279 knockout of inhibitor  
 280 target *MAPK1* and its  
 281 downstream target  
 282 *RPS6KA3* have strong  
 283 synthetic sick/lethal or  
 284 negative interactions with

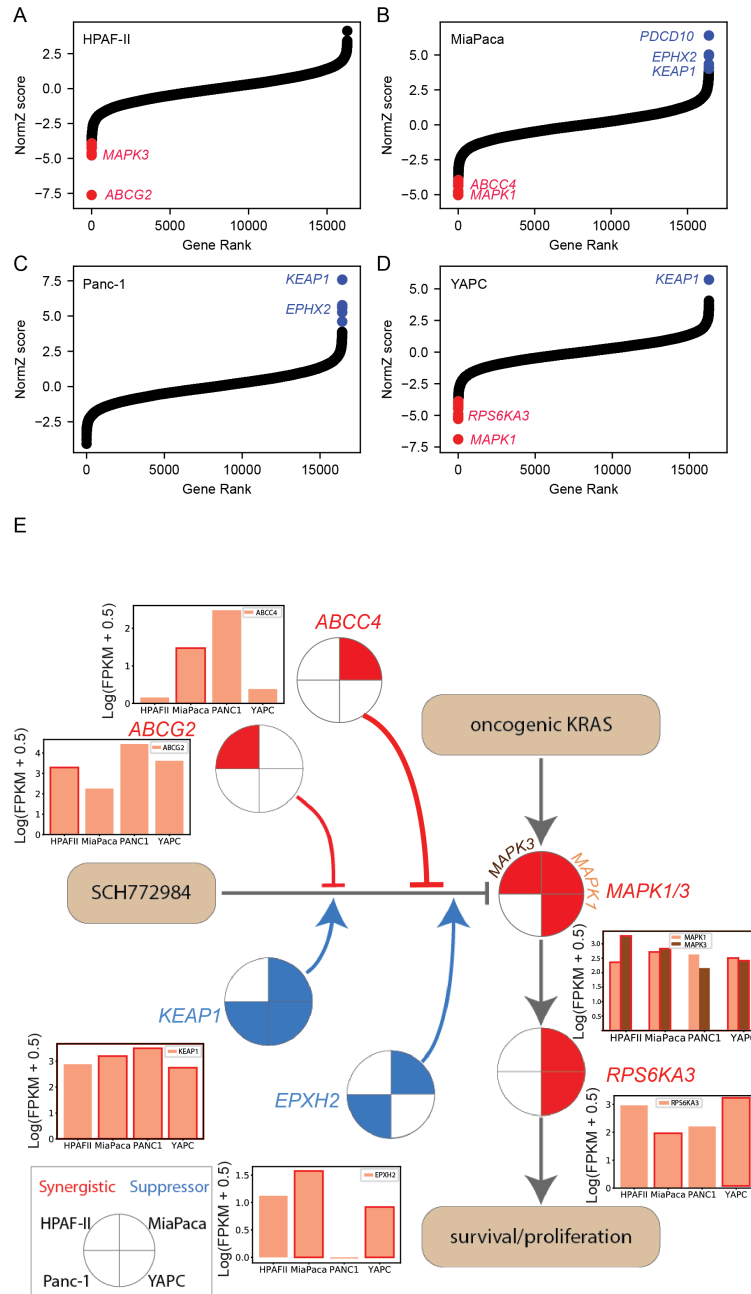

**Figure 3. ERK inhibitor screens in pancreatic cancer cell lines.** (A) drugZ NormZ score is plotted vs. gene rank for SCH772984 screen in HPAF-II pancreatic cancer cells. Red, synergistic (synthetic lethal) interactions at FDR<0.1. (B) MiaPaca cells. Blue, suppressor (resistance) interactions at FDR<0.1. (C) Panc-1 cells. (D) YAPC cells. (E) Network view of ERK inhibitor screens. Red, synthetic lethal interactions. Blue, suppressor interactions. Insets, gene expression of target genes across the four cell lines.

285 ERK inhibitor in two of the cell lines, MiaPaca and YAPC (FDR < 0.1; Figure 3a). In  
286 the third cell line, HPAF-II, the top synthetic interactors were drug transporter  
287 *ABCG2* and *MAPK3*. Activity of this drug resistance gene may account for this cell  
288 line's resistance to ERK inhibition and the lack of other synthetic effectors in this  
289 screen. Drug transporter *ABCC4* is synthetic lethal in MiaPaca cells, suggesting  
290 multiple context-dependent routes of drug resistance for this molecule. Epoxide  
291 hydrolase *EPHX2* and ubiquitin ligase adapter *KEAP1* are the top two suppressors of  
292 ERK inhibitor activity in three cell lines, suggesting these genes are required for  
293 normal function of the inhibitor (Figure 3b). *KEAP1* loss-of-function was identified  
294 as a modulator of MAP kinase pathway inhibitors in a panel of positive selection  
295 screens in multiple cell lines[11], but *EPHX2* is a novel candidate resistance gene.  
296 Notably, the ERK inhibitor screens yielded a small number of discrete synthetic and  
297 suppressor hits, in contrast with the PARP inhibitor screens, which showed broad  
298 interaction across the HR pathway, confirming the general applicability of drugZ in  
299 detecting drug-gene interactions.

300

301 We further tested genetic response profile of hTERT-immortalized RPE1 epithelial  
302 cells to two commonly used chemotherapeutic drugs, gemcitabine and vincristine,  
303 plus HDAC-inhibitor entinostat currently in clinical trials (Figure 4a). We used our  
304 BAGEL pipeline to identify genes whose knockout leads to fitness defect (essential  
305 genes; Bayes Factor > 10) or enhanced growth (tumor suppressors, BF < -40) in  
306 untreated control cells (Figure 4b). Each drug reveals synthetic lethal interaction  
307 with at least one pathway-specific gene. Entinostat, ostensibly an inhibitor of  
308 histone deacetylases *HDAC1* and *HDAC3*, is synthetic lethal with *HDAC7* in RPE1  
309 cells. Gemcitabine, a pyrimidine nucleoside analog, is synthetic lethal with  
310 deoxythymidylate kinase *DTYMK*. *DTYMK* phosphorylates dTMP to dTDP, a key step  
311 in the synthesis-by-salvage pathway of dTTP [38]. Vincristine, a microtubule  
312 stabilizer, is synthetic lethal with *CLASP1*, a nonmotor microtubule-associated  
313 protein that promotes kinetochore-microtubule attachment [39]. Vincristine is  
314 further synthetic lethal with drug transporter *ABCC1* (multidrug resistance protein  
315 *MRP1*), a known marker of vincristine resistance [40, 41].

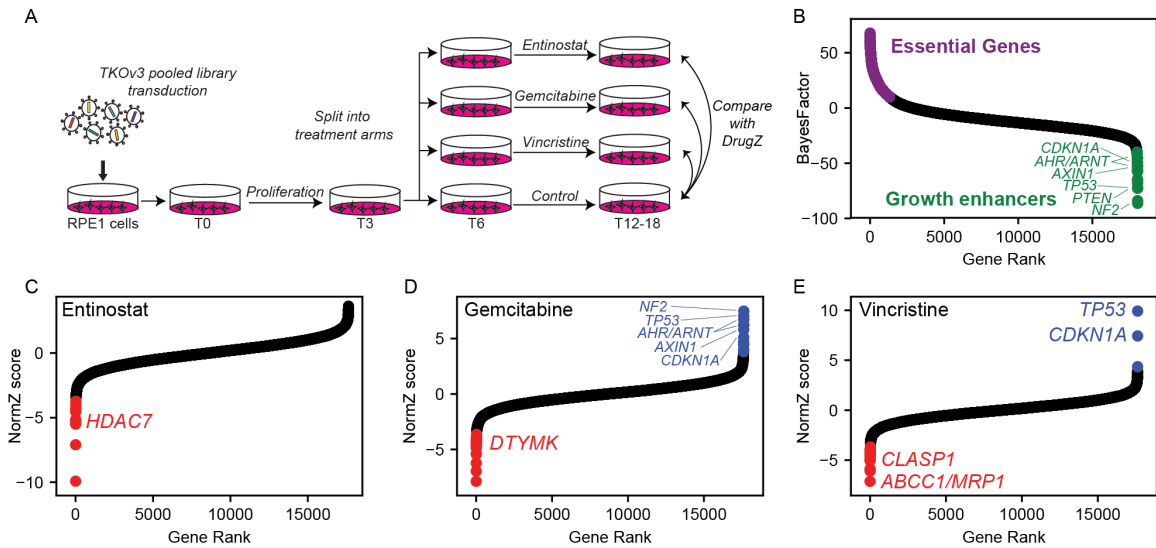

**Figure 4. Multiple drug screens in hTERT-RPE1 cells.** (A) Experimental design. The TKOv3 lentiviral library was transduced into RPE1 cells, expanded, and split into four treatment arms (in duplicate). (B) Control cells were analyzed with BAGEL to identify essential genes (purple) and putative tumor suppressors (green). (C) NormZ scores for RPE1 entinostat screen; colors as in Figure 3. (D) NormZ scores for RPE1 gemcitabine screen. (E) NormZ scores for RPE1 vincristine screen.

316

317 Two of the three drugs appear to show suppressor interactions with known tumor  
 318 suppressors, including TP53/CDKN1A, NF2, and the aryl hydrocarbon receptor  
 319 complex AHR/ARNT. This epistatic interaction is probably driven by the drug  
 320 treatment masking the growth-enhancing effect of knocking out these genes rather  
 321 than a clinically useful drug-gene interaction. The growth-enhancing effects of  
 322 knocking out tumor suppressor genes in responsive cell lines is likely to be a  
 323 systematic source of false positives for suppressor interactions using this approach.

324

## 325 Conclusions

326

327 Identifying the genetic drivers of drug effectiveness and resistance is critical to  
 328 realize the promise of personalized medicine. Chemogenetic interaction screens in  
 329 mammalian cells using CRISPR knockout libraries have so far been primarily used in  
 330 a positive selection format to identify the genes, pathways and mechanisms of  
 331 acquired resistance to chemotherapeutic drugs. However, negative selection screens

332 to identify the underlying architecture of drug-gene interactions have been difficult  
333 to carry out and to analyze in part due to the lack of robust analytical tools.

334

335 We describe the drugZ algorithm, which calculates a gene-level Z-score for pooled  
336 library CRISPR drug-gene interaction screens. By taking into account the moderate  
337 single mutant fitness defects associated with many genes involved in drug-gene  
338 interactions, the drugZ algorithm offers significantly improved sensitivity over  
339 contemporary analysis platforms. The algorithm was developed to exploit the  
340 additional resolving power we expected to gain from a paired-sample experimental  
341 design, but surprisingly this has virtually no effect on our results. We demonstrate  
342 the validity of our hits by showing the strong enrichment for genes involved in the  
343 DNA damage response in a screen for interactions with the PARP inhibitor olaparib  
344 and the precise detection of MAPK pathway effectors in an ERK inhibitor screen. We  
345 further show that both synergistic and suppressor interactions can be identified in  
346 the same screen, as the previously identified PARP resistance gene *TP53BP1* and  
347 newly characterized *SHLD1* (formerly *C20orf196*) are top-ranked suppressors of  
348 olaparib activity in *BRCA1*-mutant SUM149PT screens. Moreover, both synthetic  
349 targets *MAPK1/3* and *RPS6KA3* and suppressor genes *EPHX2* and *KEAP1* are  
350 identified in ERK inhibition screens. *KEAP1* deletion or mutation is frequently found  
351 in KRAS-driven lung adenocarcinomas and may present an obstacle to ERK inhibitor  
352 therapy in these tumors.

353

354 Experimental design plays a critical role in the ability to accurately identify drug-  
355 gene interactions. Negative selection screens for synthetic lethal interactions  
356 require that cells be carried long enough for dropouts – typically growth defects  
357 rather than full synthetic lethals – to rise to statistical significance. Our results,  
358 concordant with known highly drug-specific differences in effect timing, suggest  
359 that each there is value in collecting multiple timepoints to ensure that drug activity  
360 and genetic interaction are detectable, and that traditional dose-response curves  
361 must be calculated over a timecourse relevant to the screen (e.g. at least two  
362 passages or several doublings).

363

364 Despite these technical idiosyncrasies, chemogenetic interaction screens extend the  
365 utility of CRISPR genome-scale perturbation screens by enabling the systematic  
366 surveying of the landscape of drug-gene interactions across cancer-relevant genetic  
367 backgrounds. Understanding this variation may lead to more precise therapies for  
368 patients as well as the development of synergistic drug combinations for genotype-  
369 specific treatments.

370

371

## 372 **Acknowledgments**

373

374 MC, GW, WFL, and TH were supported by MD Anderson Cancer Center Support  
375 Grant P30 CA016672 (the Bioinformatics Shared Resource) and the Cancer  
376 Prevention Research Institute of Texas (CPRIT) grant RR160032, and TH is  
377 supported by NIGMS grant R35GM130119. MZ is a Banting postdoctoral fellow.  
378 Work in the DD lab was funded through CIHR grant FDN143343, Canadian Cancer  
379 Society grant #70389, as well as a Grant-in-Aid from the Krembil Foundation. Work  
380 in JM lab is funded through CIHR grants 342551 and 365646. Work in SA lab was  
381 funded through a CIHR grant #361837.

382

## 383 **Competing Interests**

384

385 T. Hart and D. Durocher are consultants for Repair Therapeutics.

386

## 387 **Data and material availability**

388

389 All software described in this manuscript, as well as all data files used for analysis,  
390 are available at the Hart Lab github site ([github.com/hart-lab/drugz](https://github.com/hart-lab/drugz)) as well as the  
391 Hart Lab website ([hart-lab.org](http://hart-lab.org)).

392

## 393 **Methods**

394

395 ***DrugZ algorithm***

396

397 We calculate the  $\log_2$  fold change of each gRNA in the pool by normalizing the total  
398 read count of each sample (to n=10 million reads) at the same timepoint and taking  
399 the log ratio, for each replicate, of treated to control reads.

400

$$fc_r = \log_2 \left[ \frac{\text{norm}(T_{t,r}) + \text{pseudocount}}{\text{norm}(C_{t,r}) + \text{pseudocount}} \right]$$

401 Where:

- 402 •  $fc$  = fold change
- 403 •  $r$  = replicate indication
- 404 •  $T$  = treated sample
- 405 •  $C$  = control sample
- 406 •  $t$  = time point
- 407 • pseudocount = default value is 5

408

409 We estimate the variance of each fold change by calculating the standard deviation  
410 of fold changes with similar abundance in the control sample:

411

*sort( $fc_r$ ) according  $C_r$  (descending = True)*

$$eb\_std_{fc_r} = \sqrt{\frac{1}{N} \sum_i^N (fc_{r,i} - \mu)^2}$$

412 Where:

- 413 •  $eb\_std_{fc_r}$  = estimated variance
- 414 •  $N$  = number of fold changes with similar abundance (default = 1000)
- 415 •  $i$  = guide
- 416 •  $fc_{r,i}$  = fold change for each guide in a replicate
- 417 •  $\mu = 0$

418

419

420

421 and then calculate a Z-score for each fold change using this estimate:

$$Z_{fc_{r,i}} = \frac{fc_{r,i}}{eb\_std_{fc_{r,i}}}$$

422

423

424 The guide Z score of all gRNA across all replicates is summed to get a gene-level  
425 sumZ score, which is then normalized (by dividing by the square root of the number  
426 of summed terms) to the final normZ (Figure 1B)

$$normZ_{geneA} = \frac{\sum Z_{fc_{r,i}^{geneA}}}{\sqrt{n}}$$

427

428 A P-value is calculated from the normZ, and corrected for multiple hypothesis  
429 testing using the method of Benjamini and Hochberg [42]. The open-source Python  
430 software can be downloaded from [github.com/hart-lab/drugz](https://github.com/hart-lab/drugz).

431

### 432 ***DrugGS algorithm***

433

434 After Empirical Bayes variance estimation approach is applied on normalized log  
435 fold changes to calculate a Z-score for each guide, we applied Gibbs sampling to  
436 generate posterior distribution of fold changes for each gene.

437

438 Posterior  $\sim$  Likelihood \* Prior

$$439 \quad P(\mu, \tau | \text{data}) = \frac{P(\text{data} | \mu, \tau) * P(\mu, \tau)}{P(\text{data})} \text{ posterior}$$

440  $P(\text{data} | \mu, \tau)$  likelihood

441  $P(\mu, \tau)$  prior

442

443 Each gene has a distribution composed of Z-scores for guides targeting that specific  
444 gene across replicates. Distribution is characterized as  $\mathbb{N}(\mu, \tau)$ , where  $\tau$  is  $\frac{1}{\sigma^2}$ .

445

446 Both  $\mu$  and  $\tau$  have hyperparameters ( $\mu : \mu, \sigma^2, \tau : a, b$ ) that we initialize at the very  
447 start of sampling.

448

449  $P(\tau | \text{data}) \sim \Gamma(a, b)$  = Gamma prior with a (shape) and b (rate) hyperparameters

450  $P(\mu | \tau, \text{data}) \sim \mathbb{N}(\mu, \sigma^2)$  = Normal prior with  $\mu$  (mean) and  $\sigma^2$  (variance)

451 hyperparameters

452

453 We then update  $\mu$  and  $\tau$  with respect to their priors in every of 1000 samples that  
454 we generate for each gene.

455

456 Equations to update  $\mu$ :

457

$$\mu_{update} = \frac{(n * \bar{y} * \tau) + (\mu_{prior} * \tau_{prior})}{n * \tau + \tau_{prior}}$$
$$\sigma_{update} = \frac{1}{\sqrt{n * \tau + \tau_{prior}}}$$

458

459 Equations to update  $\tau$ :

$$a_{update} = a_{prior} + \frac{n}{2}$$
$$b_{update} = b_{prior} + \sum (Z_{fc_{r,i}} - \mu)^2$$

460

461 Where:

462 •  $n$  = number of data points (guide Z scores) for each gene

463 •  $\bar{y}$  = actual mean of data points

464



465 From those 1000 newly sampled  $\mu$  and  $\tau$ , we then calculate mean and standard  
466 deviation. Each gene's  $\mu$  posterior distribution's mean is what was converted into Z  
467 score and used to compare with the drugZ normZ values.

468

$$Z_{geneA} = \frac{\sum_{k=1}^S \mu_k}{S}$$

469 Where:

470 • S = number of samples (in our case 1000)

471 • k = sample

472

473

474

#### 475 ***Drug-Gene interaction screens***

476

477 Olaparib screens were described in [15].

478

#### 479 **Cell Culture**

480 hTERT RPE-1 (CRL-4000) and 293T (CRL-3216) cells were purchased from the  
481 ATCC and grown in Dulbecco's High Glucose Modified Eagle Medium  
482 (DMEM;HyClone) with 10% fetal bovine serum (FBS), 1 X GlutaMAX (Gibco),  
483 100mM sodium pyruvate (Gibco), 1 X non-essential amino acids (NEAA), 1X  
484 penicillin-streptomycin (Pen/Strep), and 5ug ml<sup>-1</sup> Plasmocure. Incubator conditions  
485 were kept at 37°C with 5% CO<sub>2</sub>.

486

#### 487 **Lentivirus Production**

488 For production of the TKOV3 lentivirus, 9.0 X 10<sup>6</sup> 293T cells were transfected with  
489 psPAX2 (lentiviral packaging; Addgene #12260), pMD2.G (VSV-G envelope; Addgene  
490 #12259), and TKOV3 (Toronto KnockOut CRISPR Library; Addgene #90294) using  
491 X-tremeGENE 9 DNA transfection reagent (Sigma-Aldrich) in medium with lowered  
492 antibiotic concentration (0.1X Pen/Strep). Medium was replaced with viral harvest  
493 medium (DMEM + 1.1% BSA + 1X Pen/Strep) 18 hours post-transfection. Virus-

494 containing supernatant was collected ~24-48 hours post-transfection, and fresh  
495 viral harvest medium was added to transfected plates. Virus-containing supernatant  
496 was collected again ~24 later. The virus-containing supernatant was centrifuged to  
497 remove cell debris and stored at -80°C.

498

#### 499 **CRISPR screening**

500 For transduction of the hTERT RPE-1 cells, the TKOv3 virus was added with 8ug/ml  
501 Polybrene. For selection of the transduced cells, puromycin was introduced at a  
502 concentration of 20 ug/ml at 24 hours post-infection (the hTERT cassette used to  
503 immortalize RPE1 cells contains a puromycin resistance marker, necessitating  
504 extreme puromycin concentrations for selection). Puromycin selection continued  
505 for 72 hours post-transduction and completed upon the selection against the hTERT  
506 RPE-1 parental line as a control. Completion of selection was considered the initial  
507 timepoint (T<sub>0</sub>). The TKOv3-transduced cells were split into technical replicates. To  
508 ensure proper coverage, 15 x 10<sup>6</sup> cells across 11 x 15 cm dishes were used for  
509 infection with the TKOv3 virus per replicate. The chemotherapeutic drugs  
510 Entinostat (2nM), Gemcitabine (2nM), and Vincristine (0.4nM) were added to  
511 separate replicates, with one set of replicates receiving no drug treatment. Both  
512 drug-treated and untreated replicates were not allowed to reach confluence in the  
513 15cm dishes. Cells were lifted, counted, and re-plated at the coverage stated above,  
514 and the excess cell pellets were frozen at -20°C as a timepoint. Once 8 doublings  
515 were reached from T<sub>0</sub>, the screens were terminated and pellets frozen at -20°C.  
516 Coverage of screens was kept at 200 cells per gRNA.

517

518 The QIAamp Blood Maxi Kit (Qiagen) was used to isolate the genomic DNA (gDNA)  
519 from the frozen cell pellets. Guide sequences were enriched using PCR with HiFi  
520 HotStart ReadyMix (Kapa Biosystems) and primers targeting the guide region in the  
521 genomic DNA. A second round of PCR was performed with i5 and i7 primers to give  
522 each condition and replicate a unique multiplexing barcode. The final PCR products  
523 were purified using the E-Gel System (Invitrogen), normalized, and sequenced on

524 the NextSeq500 system to determine the representation of guides under each  
525 treated and non-treated condition.

## References

1. Hartwell, L.H., et al., *Integrating genetic approaches into the discovery of anticancer drugs*. Science, 1997. **278**(5340): p. 1064-8.
2. Giaever, G., et al., *Functional profiling of the *Saccharomyces cerevisiae* genome*. Nature, 2002. **418**(6896): p. 387-91.
3. Giaever, G., et al., *Genomic profiling of drug sensitivities via induced haploinsufficiency*. Nat Genet, 1999. **21**(3): p. 278-83.
4. Jinek, M., et al., *A programmable dual-RNA-guided DNA endonuclease in adaptive bacterial immunity*. Science, 2012. **337**(6096): p. 816-21.
5. Shalem, O., et al., *Genome-Scale CRISPR-Cas9 Knockout Screening in Human Cells*. Science, 2013.
6. Wang, T., et al., *Genetic Screens in Human Cells Using the CRISPR/Cas9 System*. Science, 2013.
7. Doench, J.G., et al., *Optimized sgRNA design to maximize activity and minimize off-target effects of CRISPR-Cas9*. Nat Biotechnol, 2016. **34**(2): p. 184-91.
8. Konermann, S., et al., *Genome-scale transcriptional activation by an engineered CRISPR-Cas9 complex*. Nature, 2015. **517**(7536): p. 583-8.
9. Blondel, C.J., et al., *CRISPR/Cas9 Screens Reveal Requirements for Host Cell Sulfation and Fucosylation in Bacterial Type III Secretion System-Mediated Cytotoxicity*. Cell Host Microbe, 2016. **20**(2): p. 226-37.
10. Zhang, R., et al., *A CRISPR screen defines a signal peptide processing pathway required by flaviviruses*. Nature, 2016. **535**(7610): p. 164-8.
11. Krall, E.B., et al., *KEAP1 loss modulates sensitivity to kinase targeted therapy in lung cancer*. Elife, 2017. **6**.
12. le Sage, C., et al., *Dual direction CRISPR transcriptional regulation screening uncovers gene networks driving drug resistance*. Sci Rep, 2017. **7**(1): p. 17693.
13. Liao, S., et al., *A genetic interaction analysis identifies cancer drivers that modify EGFR dependency*. Genes Dev, 2017. **31**(2): p. 184-196.
14. Wang, T., et al., *Genetic screens in human cells using the CRISPR-Cas9 system*. Science, 2014. **343**(6166): p. 80-4.
15. Zimmermann, M., et al., *CRISPR screens identify genomic ribonucleotides as a source of PARP-trapping lesions*. Nature, 2018. **559**(7713): p. 285-289.
16. Wang, C., et al., *Genome-wide CRISPR screens reveal synthetic lethality of RNASEH2 deficiency and ATR inhibition*. Oncogene, 2018.
17. Dai, Z., et al., *edgeR: a versatile tool for the analysis of shRNA-seq and CRISPR-Cas9 genetic screens*. F1000Res, 2014. **3**: p. 95.
18. Li, W., et al., *MAGeCK enables robust identification of essential genes from genome-scale CRISPR/Cas9 knockout screens*. Genome Biol, 2014. **15**(12): p. 554.
19. Hart, T., et al., *High-Resolution CRISPR Screens Reveal Fitness Genes and Genotype-Specific Cancer Liabilities*. Cell, 2015. **163**(6): p. 1515-26.
20. Robinson, M.D., D.J. McCarthy, and G.K. Smyth, *edgeR: a Bioconductor package for differential expression analysis of digital gene expression data*. Bioinformatics, 2010. **26**(1): p. 139-40.

21. Luo, B., et al., *Highly parallel identification of essential genes in cancer cells*. Proc Natl Acad Sci U S A, 2008. **105**(51): p. 20380-5.
22. Bryant, H.E., et al., *Specific killing of BRCA2-deficient tumours with inhibitors of poly(ADP-ribose) polymerase*. Nature, 2005. **434**(7035): p. 913-7.
23. Farmer, H., et al., *Targeting the DNA repair defect in BRCA mutant cells as a therapeutic strategy*. Nature, 2005. **434**(7035): p. 917-21.
24. Ashworth, A., *A synthetic lethal therapeutic approach: poly(ADP) ribose polymerase inhibitors for the treatment of cancers deficient in DNA double-strand break repair*. J Clin Oncol, 2008. **26**(22): p. 3785-90.
25. Croft, D., et al., *Reactome: a database of reactions, pathways and biological processes*. Nucleic Acids Res, 2011. **39**(Database issue): p. D691-7.
26. Jaspers, J.E., et al., *Loss of 53BP1 causes PARP inhibitor resistance in Brca1-mutated mouse mammary tumors*. Cancer Discov, 2013. **3**(1): p. 68-81.
27. Dev, H., et al., *Shieldin complex promotes DNA end-joining and counters homologous recombination in BRCA1-null cells*. Nat Cell Biol, 2018. **20**(8): p. 954-965.
28. Ghezraoui, H., et al., *53BP1 cooperation with the REV7-shieldin complex underpins DNA structure-specific NHEJ*. Nature, 2018. **560**(7716): p. 122-127.
29. Mirman, Z., et al., *53BP1-RIF1-shieldin counteracts DSB resection through CST- and Polalpha-dependent fill-in*. Nature, 2018. **560**(7716): p. 112-116.
30. Noordermeer, S.M., et al., *The shieldin complex mediates 53BP1-dependent DNA repair*. Nature, 2018. **560**(7716): p. 117-121.
31. Aguirre, A.J., et al., *Genomic Copy Number Dictates a Gene-Independent Cell Response to CRISPR/Cas9 Targeting*. Cancer Discov, 2016. **6**(8): p. 914-29.
32. Koike-Yusa, H., et al., *Genome-wide recessive genetic screening in mammalian cells with a lentiviral CRISPR-guide RNA library*. Nature biotechnology, 2014. **32**(3): p. 267-73.
33. Tzelepis, K., et al., *A CRISPR Dropout Screen Identifies Genetic Vulnerabilities and Therapeutic Targets in Acute Myeloid Leukemia*. Cell Rep, 2016. **17**(4): p. 1193-1205.
34. Wang, T., et al., *Gene Essentiality Profiling Reveals Gene Networks and Synthetic Lethal Interactions with Oncogenic Ras*. Cell, 2017.
35. Hart, T., et al., *Evaluation and Design of Genome-Wide CRISPR/SpCas9 Knockout Screens*. G3 (Bethesda), 2017. **7**(8): p. 2719-2727.
36. Ong, S.H., et al., *Optimised metrics for CRISPR-KO screens with second-generation gRNA libraries*. Sci Rep, 2017. **7**(1): p. 7384.
37. Meyers, R.M., et al., *Computational correction of copy number effect improves specificity of CRISPR-Cas9 essentiality screens in cancer cells*. Nat Genet, 2017. **49**(12): p. 1779-1784.
38. Arner, E.S. and S. Eriksson, *Mammalian deoxyribonucleoside kinases*. Pharmacol Ther, 1995. **67**(2): p. 155-86.
39. Maiato, H., et al., *Human CLASP1 is an outer kinetochore component that regulates spindle microtubule dynamics*. Cell, 2003. **113**(7): p. 891-904.
40. Cole, S.P., et al., *Overexpression of a transporter gene in a multidrug-resistant human lung cancer cell line*. Science, 1992. **258**(5088): p. 1650-4.

41. Godinot, N., et al., *Cloning and functional characterization of the multidrug resistance-associated protein (MRP1/ABCC1) from the cynomolgus monkey*. *Mol Cancer Ther*, 2003. **2**(3): p. 307-16.
42. Benjamini, Y. and Y. Hochberg, *Controlling the False Discovery Rate: A Practical and Powerful Approach to Multiple Testing*. *Journal of the Royal Statistical Society*, 1995. **57**(1): p. 289-300.

## Supplementary Figures

A

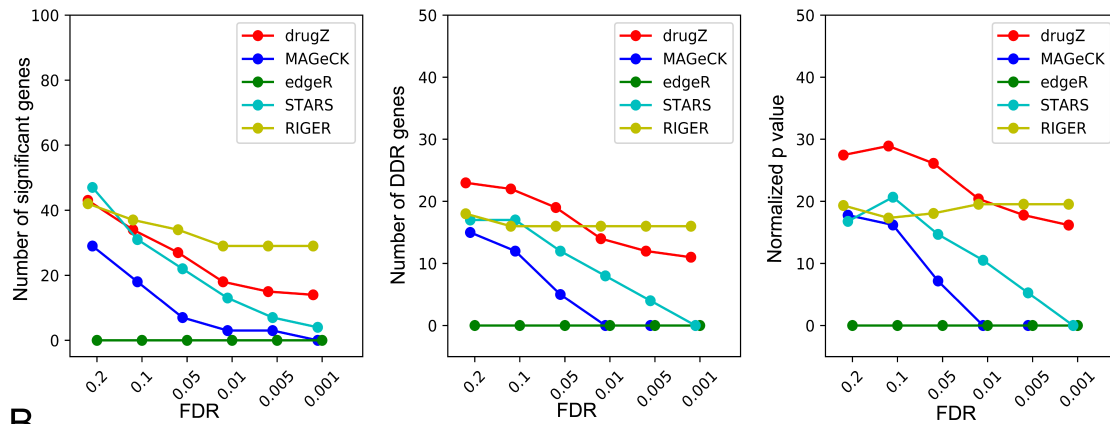

B

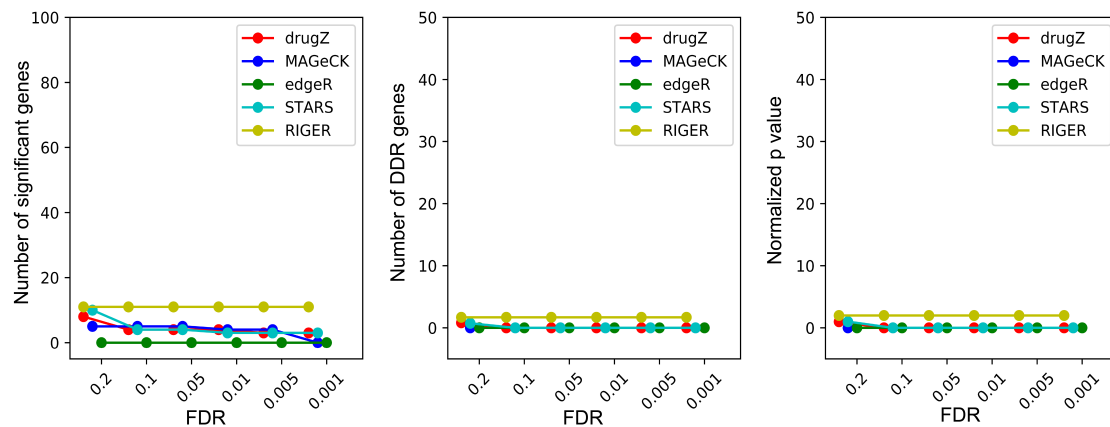

**Supplementary Figure 1. DrugZ vs. other methods for HeLa (A) and RPE1 (B) with olaparib screens.** Methods are colored as in Fig.1C. DrugZ hits show strongest enrichment for DDR genes across a range of FDR thresholds in these two screens as well but less overall effect in RPE1 cells. **(A)** Left, number of raw hits. Center, number of annotated DNA Damage Response (DDR) genes in hits. Right, log P-values for DDR gene enrichment. **(B)** All three panels are the same as in (A), for RPE1 screen.

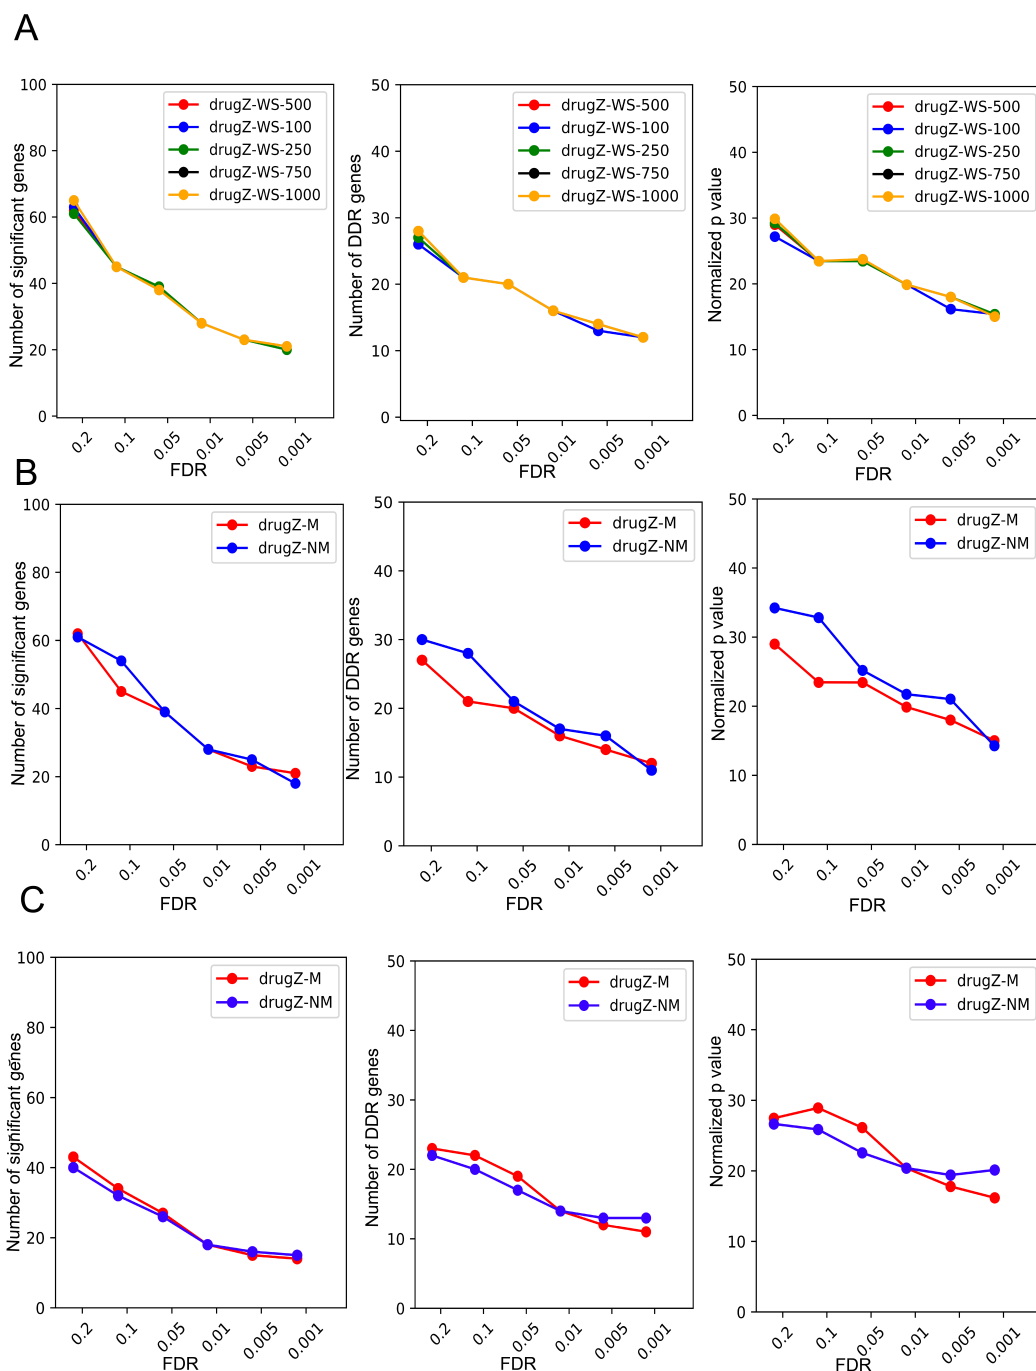

### Supplementary Figure 2. DrugZ tunable parameters.

**(A)** DrugZ performance across different window sizes for Empirical Bayes estimation of variance. Left, number of raw hits. Center, number of annotated DNA Damage Response (DDR) genes in hits. Right, log P-values for DDR gene enrichment. **(B)** DrugZ performance with correction that ensures monotonicity in the variance (red) vs. drugZ performance with no correction that ensures monotonicity in the variance (blue) in SUM149PT olaparib screen (panels same as in (A)). **(C)** DrugZ performance with correction that ensures monotonicity in the variance (red) vs. drugZ performance with no correction that ensures monotonicity in the variance (blue) in HeLa olaparib screen (panels same as in (A) and (B)).



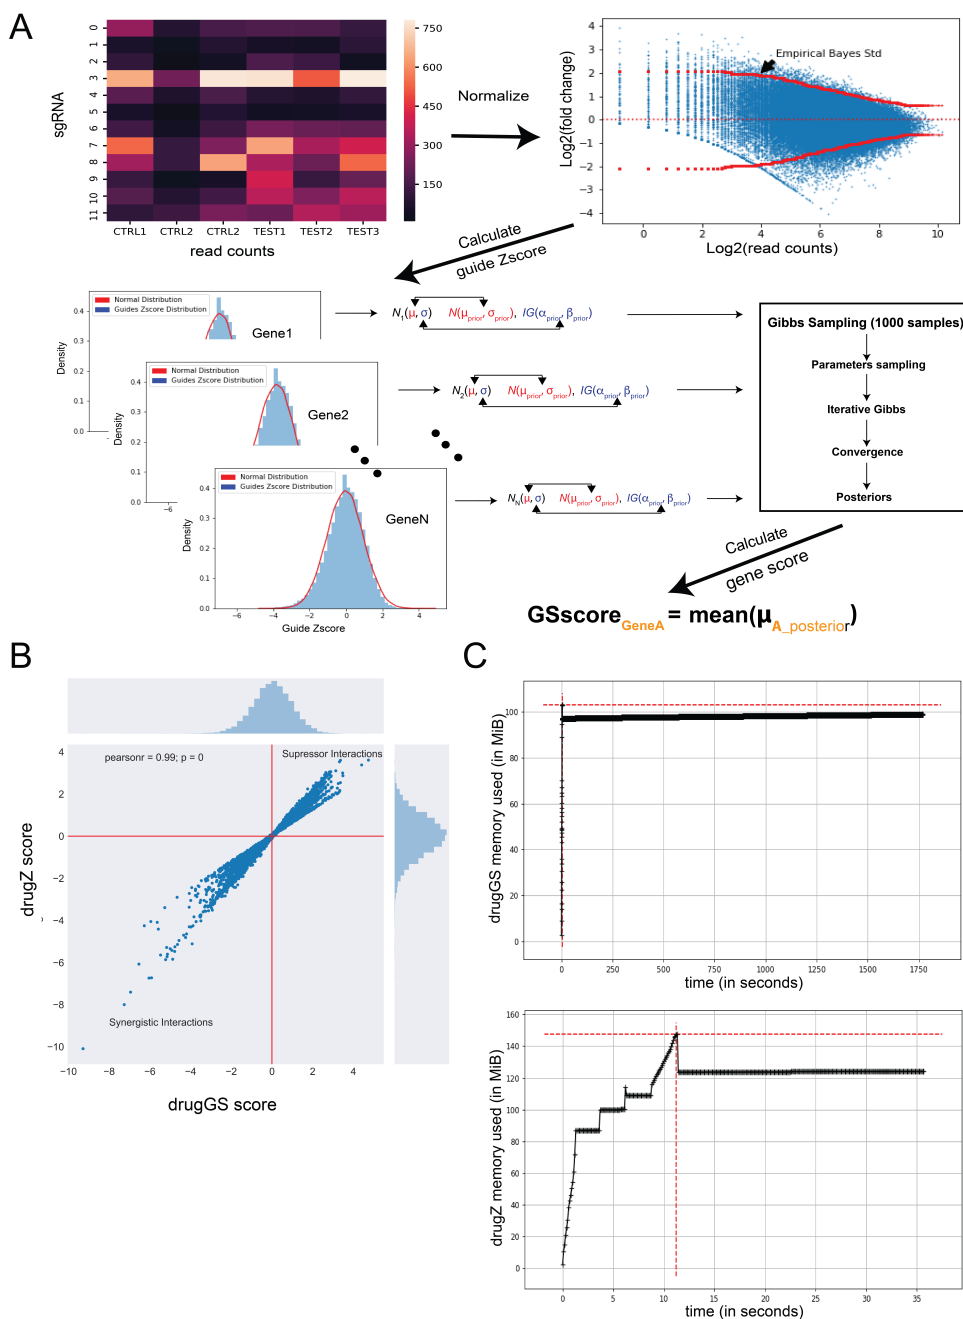

### Supplementary Figure 3. DrugZ vs. DrugGS

**(A)** DrugGS Computational Diagram. DrugGS processing steps are the same as in DrugZ until the step where gene-level scores are generated. After guide-level Z-scores are obtained, they are used as a prior distribution for gene-level score in the Gibbs sampler. The mean of the generated samples of means is considered as the new gene score. **(B)** Comparison between drugGS (x-axis) and drugZ (y-axis) gene scores. High correlation between the two ( $\rho = 0.99$ ). **(C)** Comparison between drugGS (top) and drugZ (bottom) time and memory performance. DrugZ drastically outperforms drugGS in terms of time and memory used.

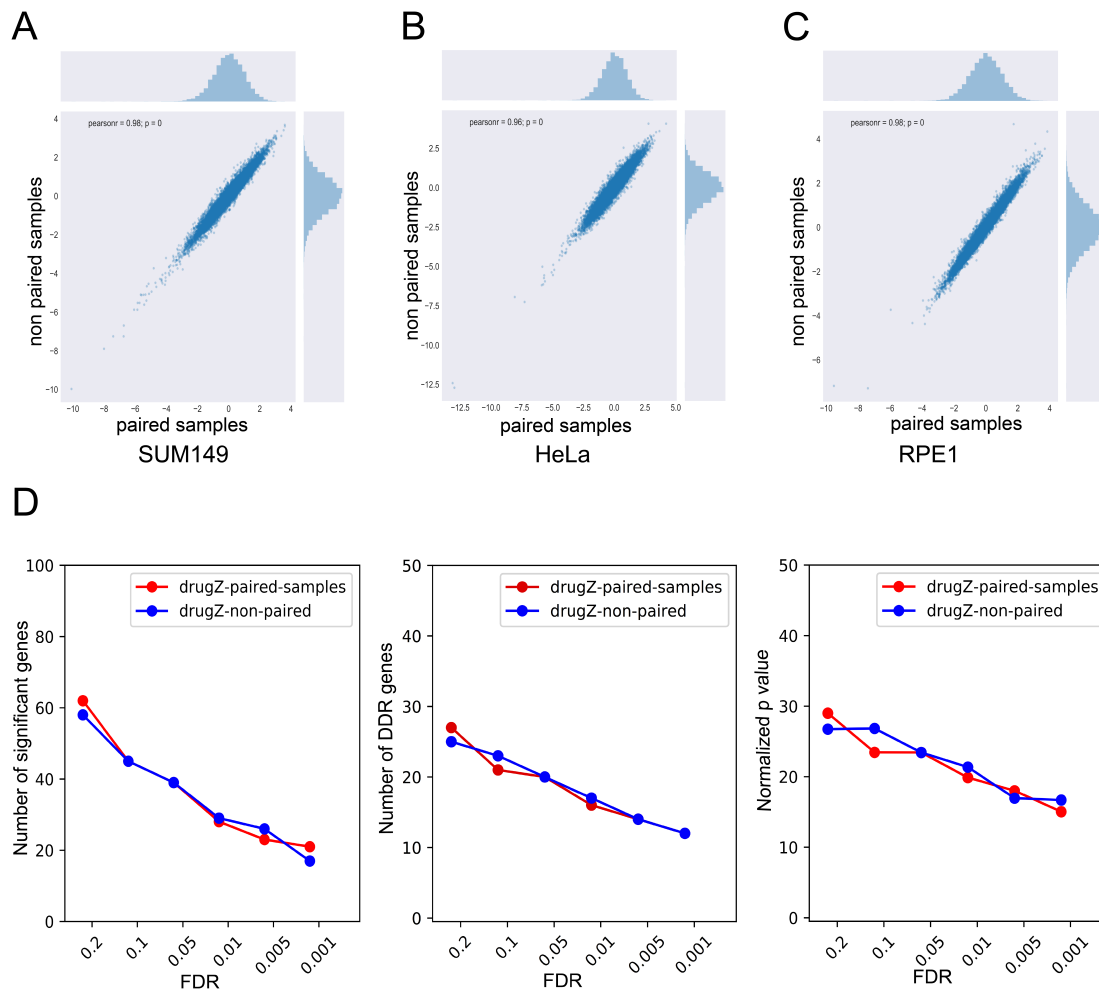

**Supplementary Figure 4. High correlation between paired and non-paired approaches in there olaparib screens. (A)** Correlation between paired samples (control A – treated A, control B – treated B, etc.) vs. non-paired (mean (control A, B, C) – mean (drug A, B, C.)) for Sum149 olaparib screen ( $\rho = 0.98$ ) **(B)** Same as in (A) for HeLa olaparib screen ( $\rho = 0.96$ ) **(C)** Same as in (A) for RPE1 olaparib screen ( $\rho = 0.98$ ) **(D)** Comparison between paired and nor-paired approaches across number of significant genes, DDR genes and normalized p-values in SUM149PT olaparib screen.
